# Supplementary material
Source: PubMed Central journal article supplement (PMC3389206)
Supplement: NIHMS350449-supplement-01.pdf [file NIHMS350449-supplement-01.pdf]

**Figure 1. Study Participant Inclusion and Exclusion Criteria**

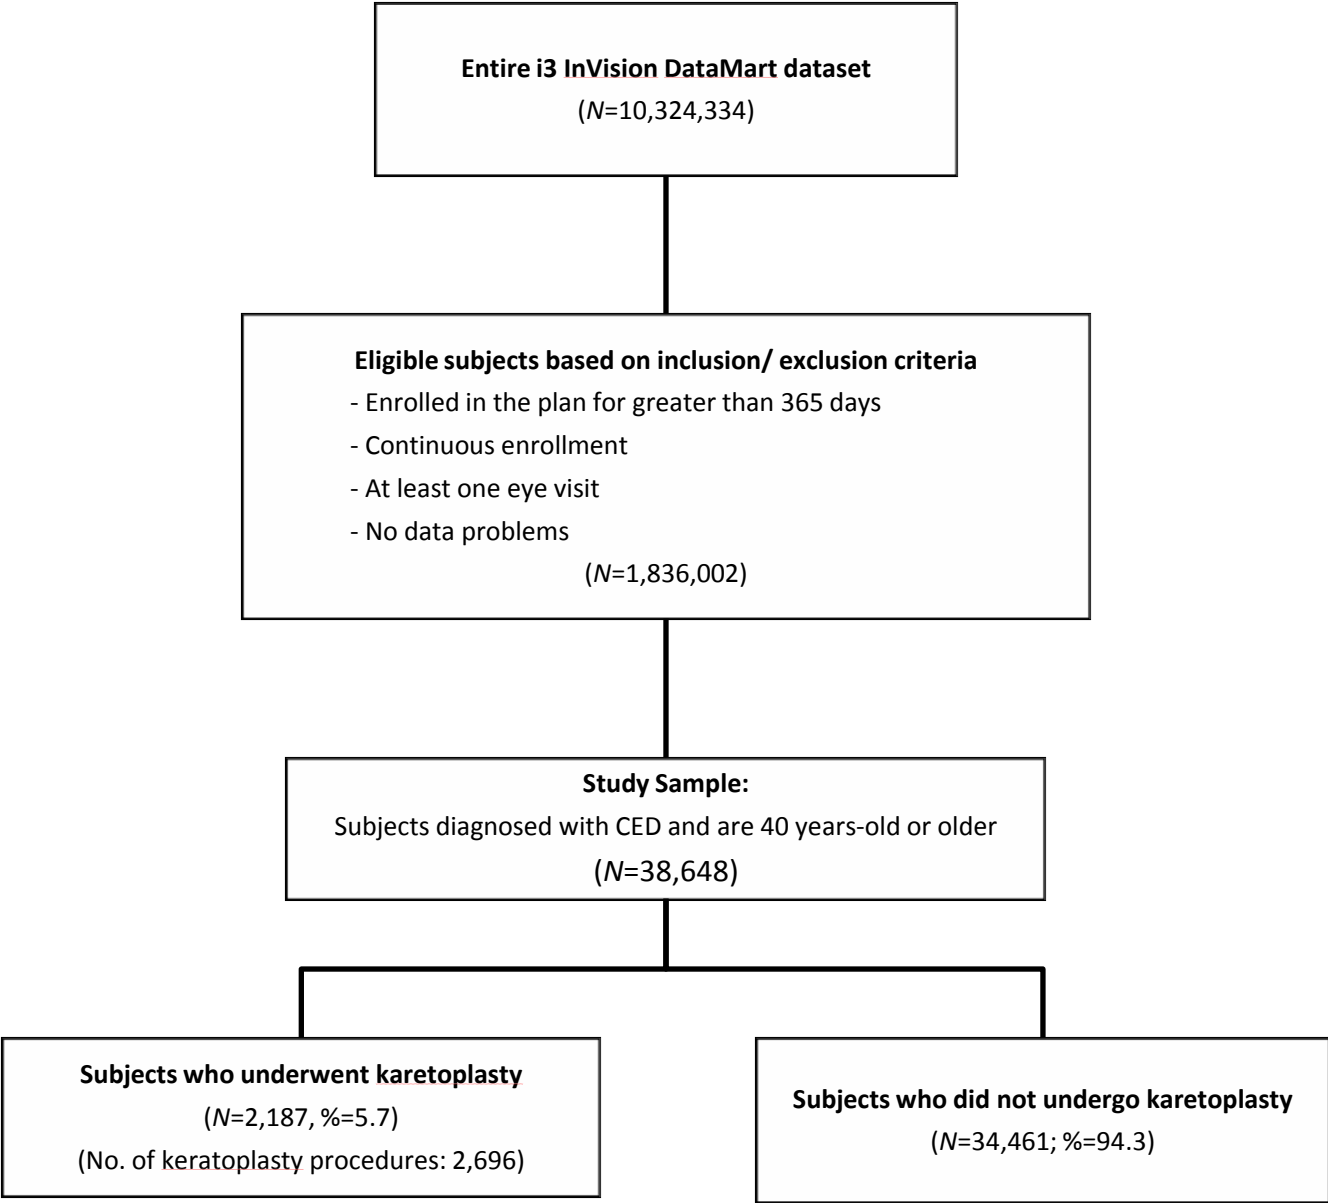

CED= corneal endothelial disease; No. = number
