# Supplementary material
Source: PubMed Central journal article supplement (PMC3389206)
Supplement: NIHMS350449-supplement-02.pdf [file NIHMS350449-supplement-02.pdf]

**Table 1. International Classification of Disease, Ninth revision, and Current Procedural Terminology Codes Used in Analysis**

|              | Diagnosis                                      | Code                                                                                                                                                                 |
|--------------|------------------------------------------------|----------------------------------------------------------------------------------------------------------------------------------------------------------------------|
| ICD-9-<br>CM | Endothelial corneal dystrophy                  | 371.57                                                                                                                                                               |
|              | Corneal edema                                  | 371.2, 371.20                                                                                                                                                        |
|              | Bullous keratopathy                            | 371.23                                                                                                                                                               |
|              | Cataract                                       | 366, 366.0, 366.00-04, 366.09, 366.1, 366.10, 366.12-19, 366.41, 366.45                                                                                              |
|              | Pseudophakia or Aphakia                        | V431, 379.3, 379.31                                                                                                                                                  |
|              | Open-angle glaucoma                            | 365.1, 365.10, 365.11, 365.12, 365.15                                                                                                                                |
|              | Macular degeneration                           | 362.51, 362.57, 362.52                                                                                                                                               |
|              | Diabetic retinopathy                           | 362.02, 362.01, 362.03-06                                                                                                                                            |
|              | Dementia                                       | 290, 290.0, 290.1, 290.10-13, 290.2, 290.20, 290.21, 290.3, 290.4, 290.40-43, 290.8, 290.9, 294.1, 294.10-11, 331.2                                                  |
|              | Depression                                     | 296, 296.0, 296.00-06, 296.1, 296.10-16, 296.2, 296.20-26, 296.3, 296.30-36, 296.4, 296.40-46, 296.5, 296.50-56, 296.6, 296.60-66, 296.7, 296.70-76, 296.8, 296.80-8 |
|              | Endophthalmitis                                | 360.0, 360.01-04                                                                                                                                                     |
|              | Suprachoroidal hemorrhage                      | 363.6, 363.61, 363.62, 363.63, 363.72                                                                                                                                |
|              | Retinal detachment                             | 361.0, 361.01-05                                                                                                                                                     |
| CPT          | Keratoplasty (corneal transplant); penetrating | 65730, 65750, 65755                                                                                                                                                  |
|              | Keratoplasty (corneal transplant); endothelial | 65756                                                                                                                                                                |

ICD-9-CM = International Classification of Diseases, 9<sup>th</sup> revision; CPT = Current Procedural Terminology
